# Supplementary material for: The Impact of Face Masks on Performance and Physiological Outcomes during Exercise: A Systematic Review and Meta-analysis
Source: bioRxiv or medRxiv preprint supplement (doi:10.1101/2021.04.22.21255951), 2021-04-27
Supplement: Supplementary file [file media-1.pdf]

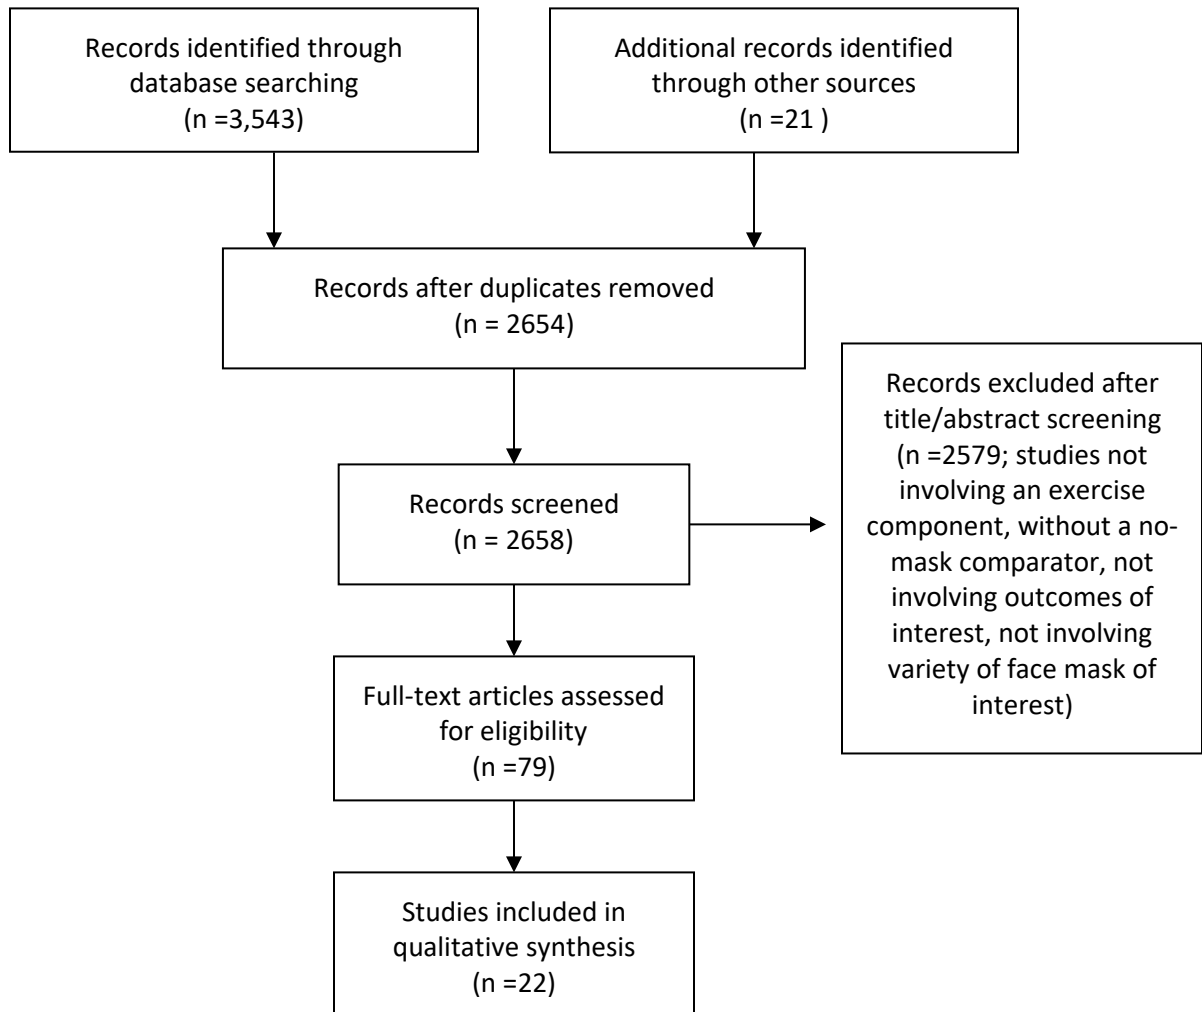

S1. PRISMA diagram: Flow chart of study selection process.

| Study or Subgroup     | Face mask |     |           | No face mask |     |           | Weight        | Std. Mean Difference<br>IV, Fixed, 95% CI |
|-----------------------|-----------|-----|-----------|--------------|-----|-----------|---------------|-------------------------------------------|
|                       | Mean      | SD  | Total     | Mean         | SD  | Total     |               |                                           |
| Fikenzer 2020         | 11.5      | 2.2 | 12        | 12.8         | 2.8 | 12        | 31.1%         | -0.50 [-1.31, 0.32]                       |
| Lassing 2020          | 9.6       | 1.4 | 13        | 11.1         | 1.8 | 13        | 31.2%         | -0.90 [-1.71, -0.09]                      |
| Shaw 2020             | -57       | 12  | 14        | -58          | 14  | 14        | 37.6%         | 0.07 [-0.67, 0.82]                        |
| <b>Total (95% CI)</b> |           |     | <b>39</b> |              |     | <b>39</b> | <b>100.0%</b> | <b>-0.41 [-0.86, 0.05]</b>                |

Heterogeneity:  $\text{Chi}^2 = 3.09$ ,  $\text{df} = 2$  ( $P = 0.21$ );  $I^2 = 35\%$

Test for overall effect:  $Z = 1.76$  ( $P = 0.08$ )

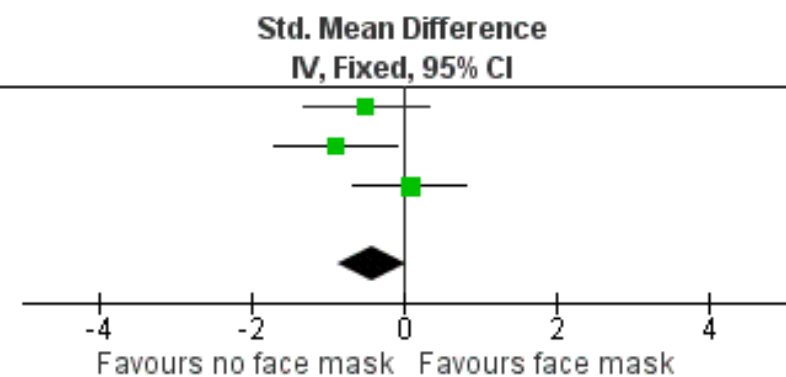

Supplementary Figure S2. Pooled analysis on the impact of masks on tissue oxygenation index

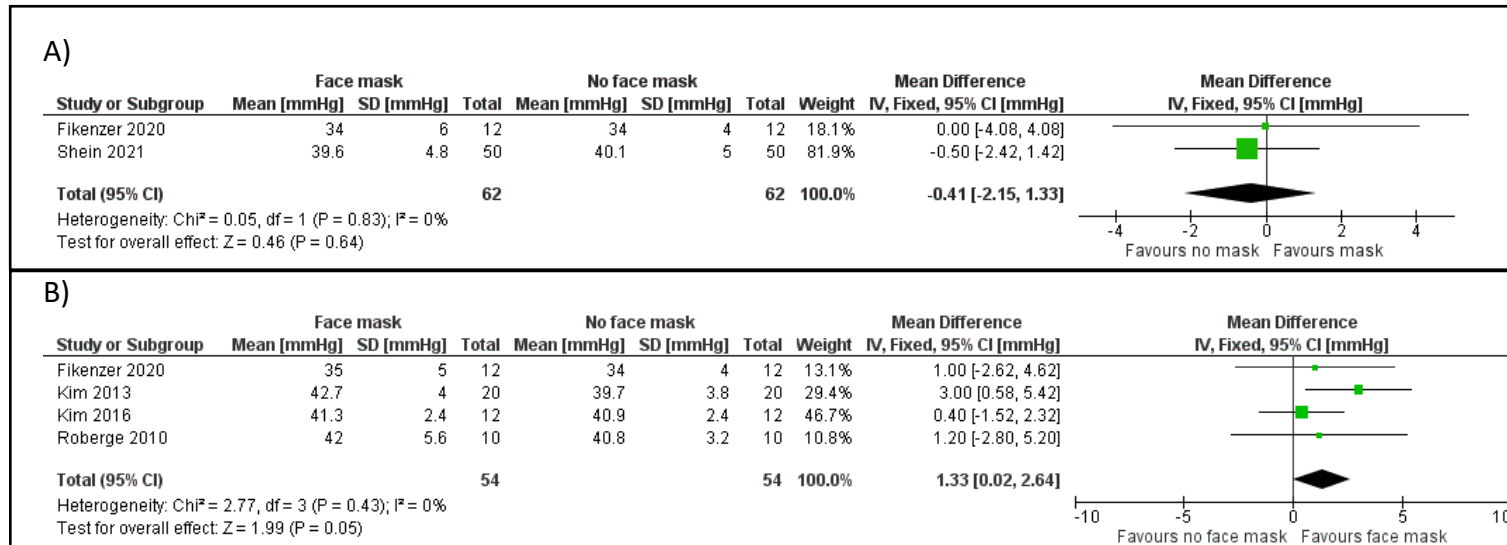

Supplementary Figure S3. Pooled analysis on the impact of surgical (A) and N95 (B) masks on arterial CO<sub>2</sub>

| Study or Subgroup     | Face mask |         |           | No face mask |         |           | Weight        | Mean Difference<br>IV, Fixed, 95% CI [ml] |
|-----------------------|-----------|---------|-----------|--------------|---------|-----------|---------------|-------------------------------------------|
|                       | Mean [ml] | SD [ml] | Total     | Mean [ml]    | SD [ml] | Total     |               |                                           |
| Fikenzer 2020         | 165       | 35      | 12        | 151          | 26      | 12        | 44.3%         | 14.00 [-10.67, 38.67]                     |
| Lassing 2020          | 179       | 26      | 13        | 168          | 31      | 13        | 55.7%         | 11.00 [-10.99, 32.99]                     |
| <b>Total (95% CI)</b> |           |         | <b>25</b> |              |         | <b>25</b> | <b>100.0%</b> | <b>12.33 [-4.09, 28.75]</b>               |

Heterogeneity: Chi<sup>2</sup> = 0.03, df = 1 (P = 0.86); I<sup>2</sup> = 0%  
 Test for overall effect: Z = 1.47 (P = 0.14)

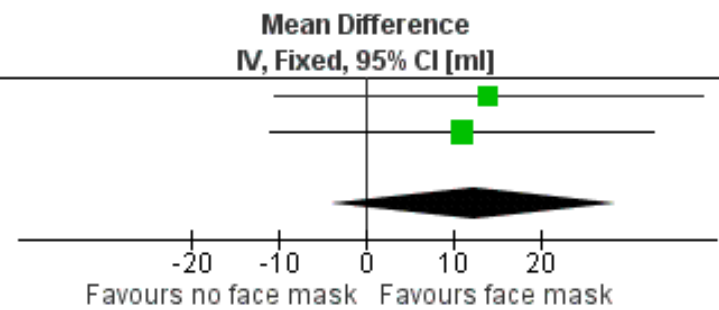

Supplementary Figure S4. Pooled analysis on the impact of masks on stroke volume

| Study or Subgroup     | Face mask    |            |           | No face mask |            |           | Weight        | Mean Difference<br>IV, Fixed, 95% CI [L/min] |
|-----------------------|--------------|------------|-----------|--------------|------------|-----------|---------------|----------------------------------------------|
|                       | Mean [L/min] | SD [L/min] | Total     | Mean [L/min] | SD [L/min] | Total     |               |                                              |
| Fikenzer 2020         | 27.3         | 5.6        | 12        | 25.8         | 4.2        | 12        | 37.0%         | 1.50 [-2.46, 5.46]                           |
| Lassing 2020          | 28.6         | 3.9        | 13        | 25.9         | 4          | 13        | 63.0%         | 2.70 [-0.34, 5.74]                           |
| <b>Total (95% CI)</b> |              |            | <b>25</b> |              |            | <b>25</b> | <b>100.0%</b> | <b>2.26 [-0.15, 4.67]</b>                    |

Heterogeneity:  $\text{Chi}^2 = 0.22$ ,  $\text{df} = 1$  ( $P = 0.64$ );  $I^2 = 0\%$

Test for overall effect:  $Z = 1.83$  ( $P = 0.07$ )

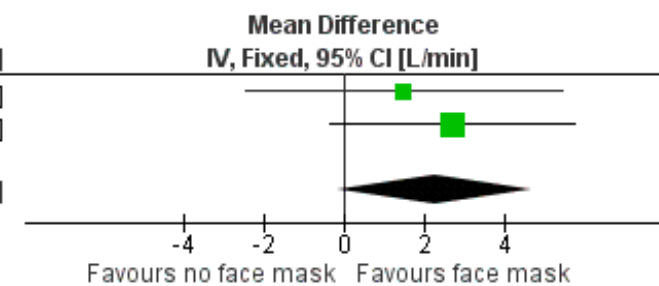

Supplementary Figure S5. Pooled analysis on the impact of masks on cardiac output

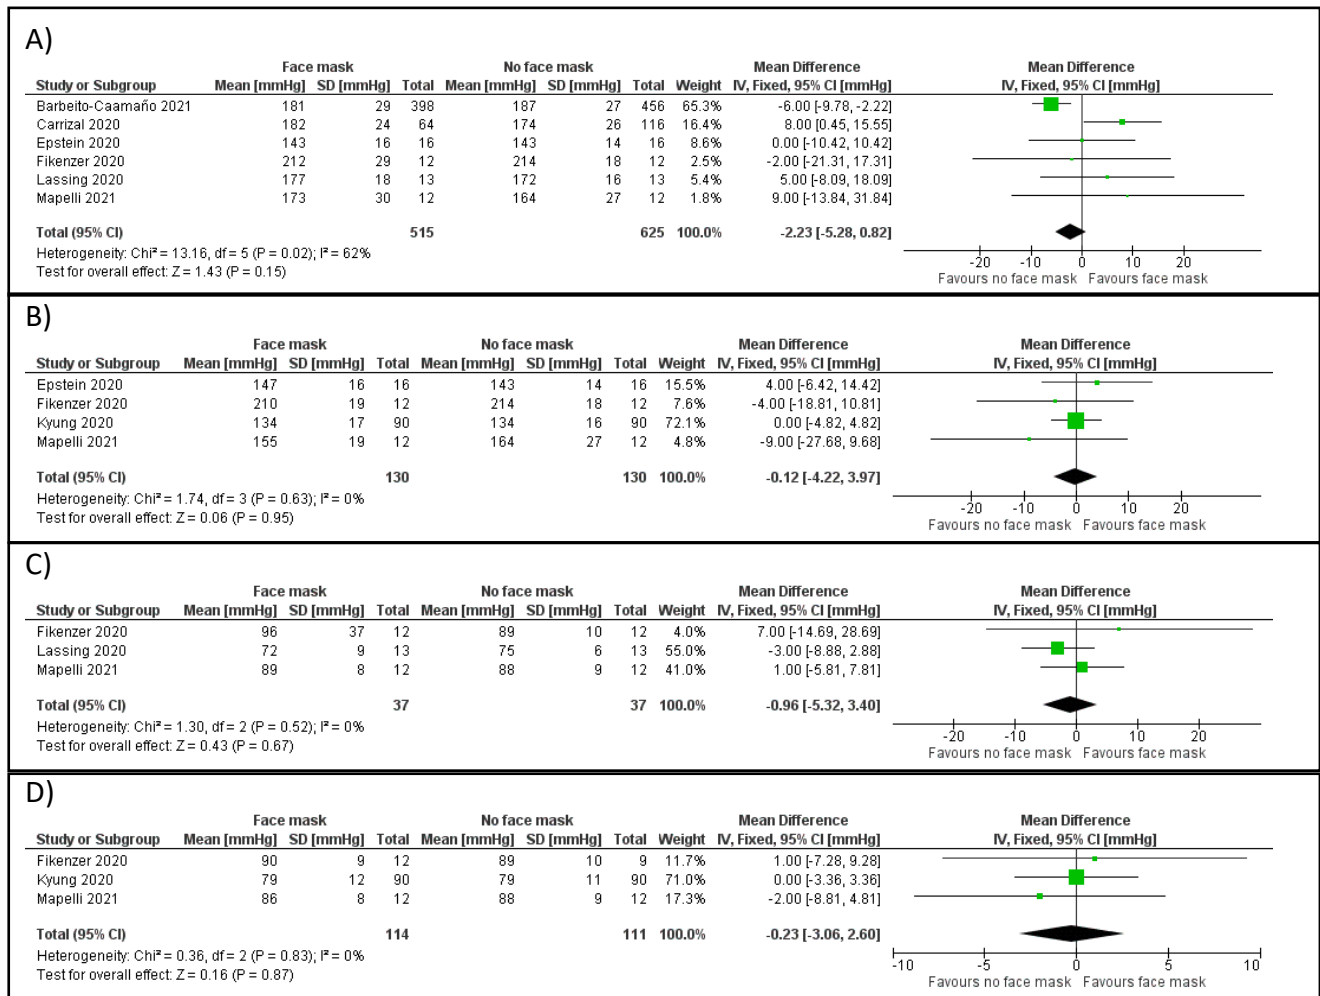

Supplementary Figure S6. Pooled analysis on the impact of masks on blood pressure. A= surgical masks on systolic blood pressure; B= N95 masks on diastolic blood pressure; C= surgical masks on systolic blood pressure; D= N95 masks on diastolic blood pressure

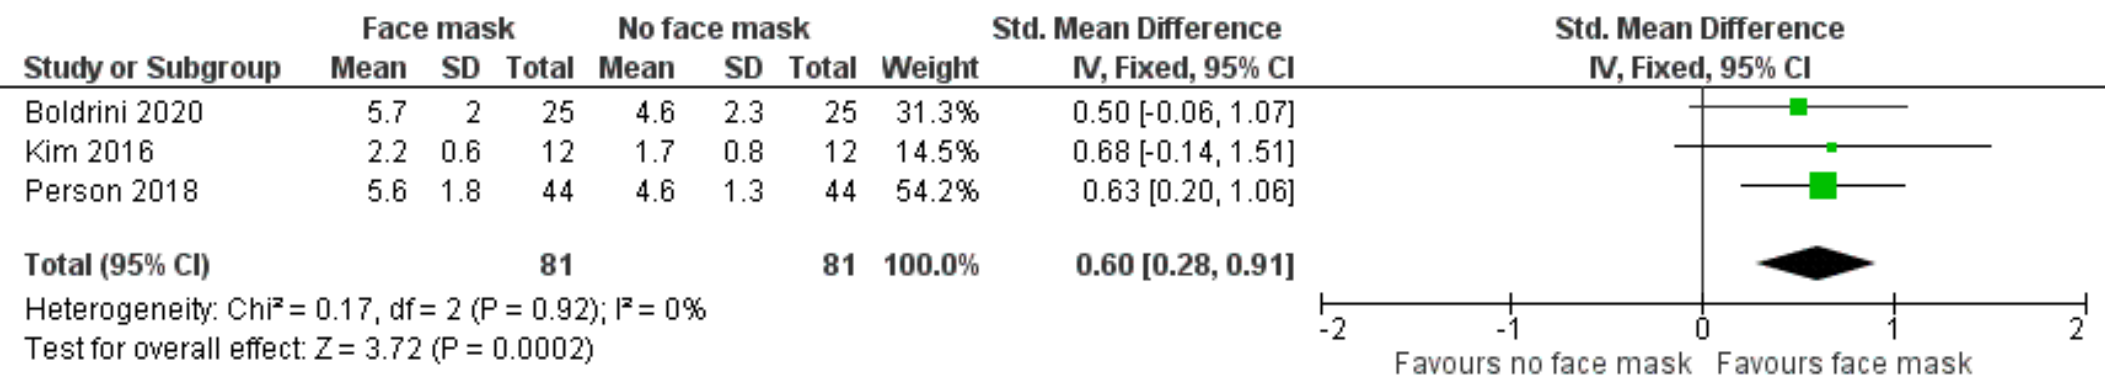

Supplementary Figure S7. Pooled analysis on the impact of masks on dyspnea

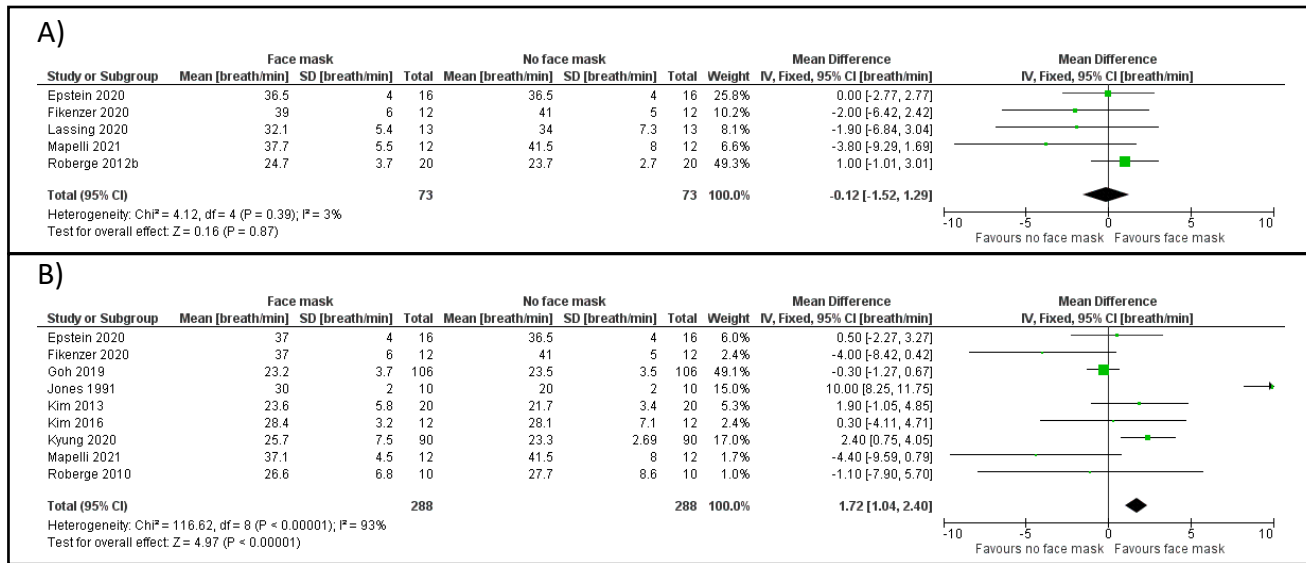

Supplementary Figure S8. Pooled analysis on the impact of surgical (A) and N95 (B) masks on respiratory rate.



A)

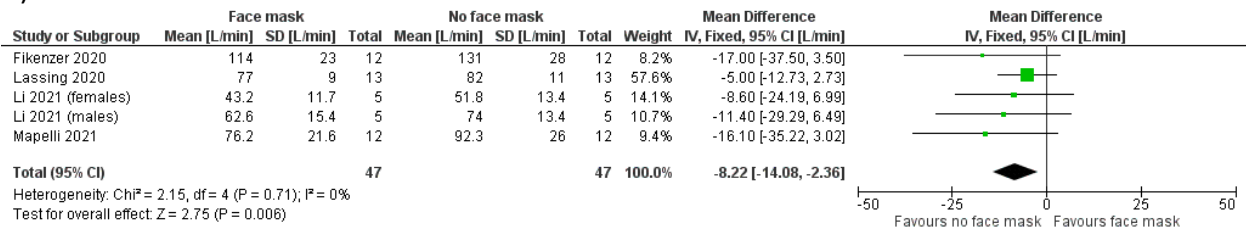

B)

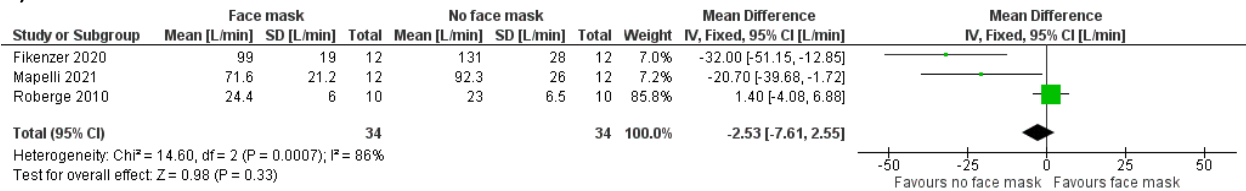

Supplementary Figure S9. Pooled analysis on the impact of surgical (A) and N95 (B) masks on ventilation.

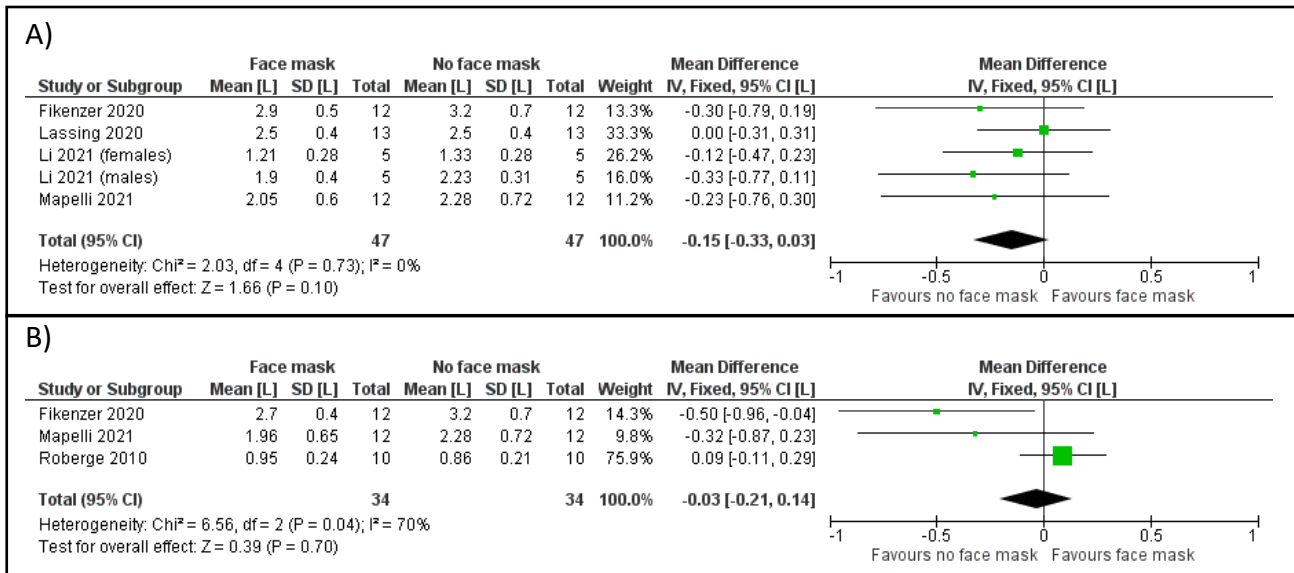

Supplementary Figure S10. Pooled analysis on the impact of surgical (A) and N95 (B) masks on tidal volume

A)

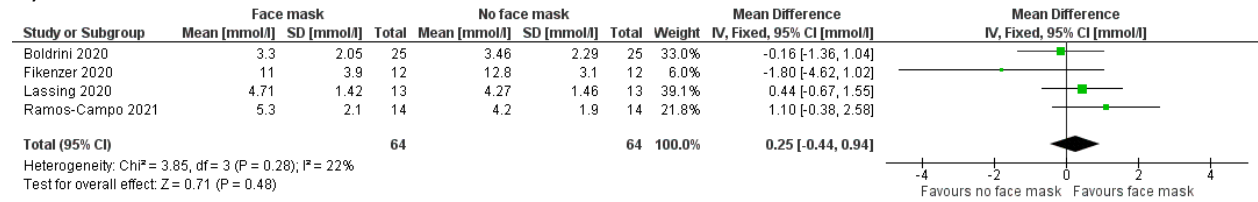

B)

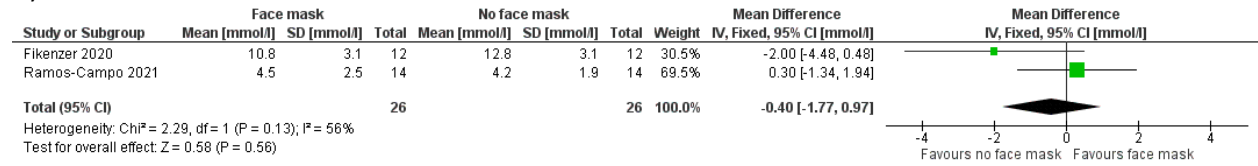

Supplementary Figure S11. Pooled analysis of the effects of surgical (A) and N95 (B) masks on lactate.
